# Supplementary material
Source: publisher figshare collection journal article supplement (https://acs.figshare.com/ndownloader/files/4010635)
Supplement: Supplementary file 1 [file 4010635]

# Transient Absorption Kinetics Associated with Higher Exciton States in Semiconducting Single-Walled Carbon Nanotubes: Relaxation of Excitons and Phonons

Takeshi Koyama,<sup>1</sup> Shohei Yoshimitsu,<sup>1</sup> Yasumitsu Miyata,<sup>2†</sup> Hisanori Shinohara,<sup>2</sup> Hideo Kishida,<sup>1</sup>  
and Arao Nakamura<sup>1,3</sup>

<sup>1</sup> Department of Applied Physics, Graduate School of Engineering, Nagoya University, Furo-cho,  
Chikusa, Nagoya 464-8603, Japan

<sup>2</sup> Department of Chemistry, Graduate School of Science, Nagoya University, Furo-cho, Chikusa, Nagoya  
464-8602, Japan

<sup>3</sup> Toyota Physical and Chemical Research Institute, Nagakute, Aichi 480-1192, Japan

<sup>†</sup> Present address: Department of Physics, Graduate School of Science and Engineering, Tokyo  
Metropolitan University, Minami-Osawa 1-1, Hachioji, Tokyo 192-0397, Japan

## Differential absorption spectra with $E_{22}$ exciton excitation for sample 1

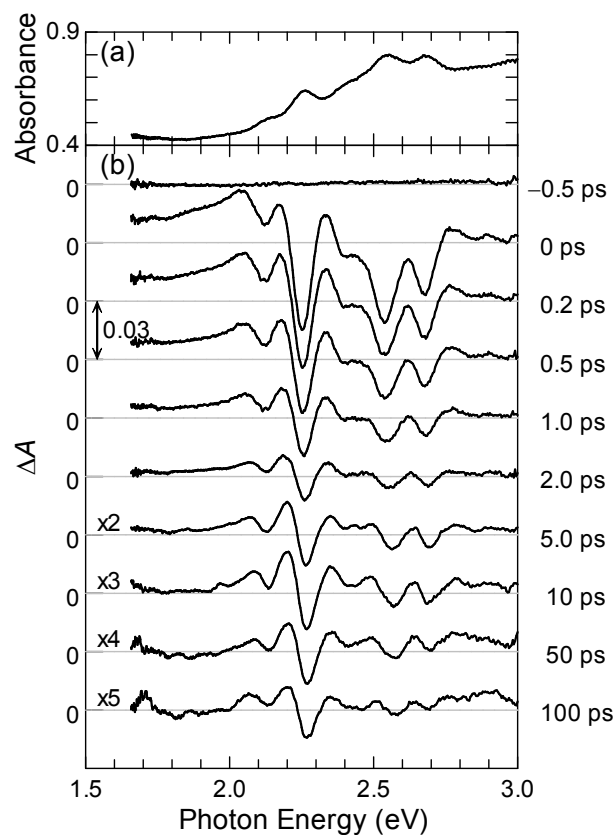

**Figure S1.** (a) Linear absorption spectrum of sample 1. (b) Differential absorption spectra at different delay times (indicated on the right of the figure) with the  $E_{22}$  exciton excitation at 1.27 eV. The pump fluence is  $5.0 \times 10^{15}$  photons  $\text{cm}^{-2}$  per pulse.

# Differential absorption spectra and time evolutions with low pump fluences for sample 1 and sample 2

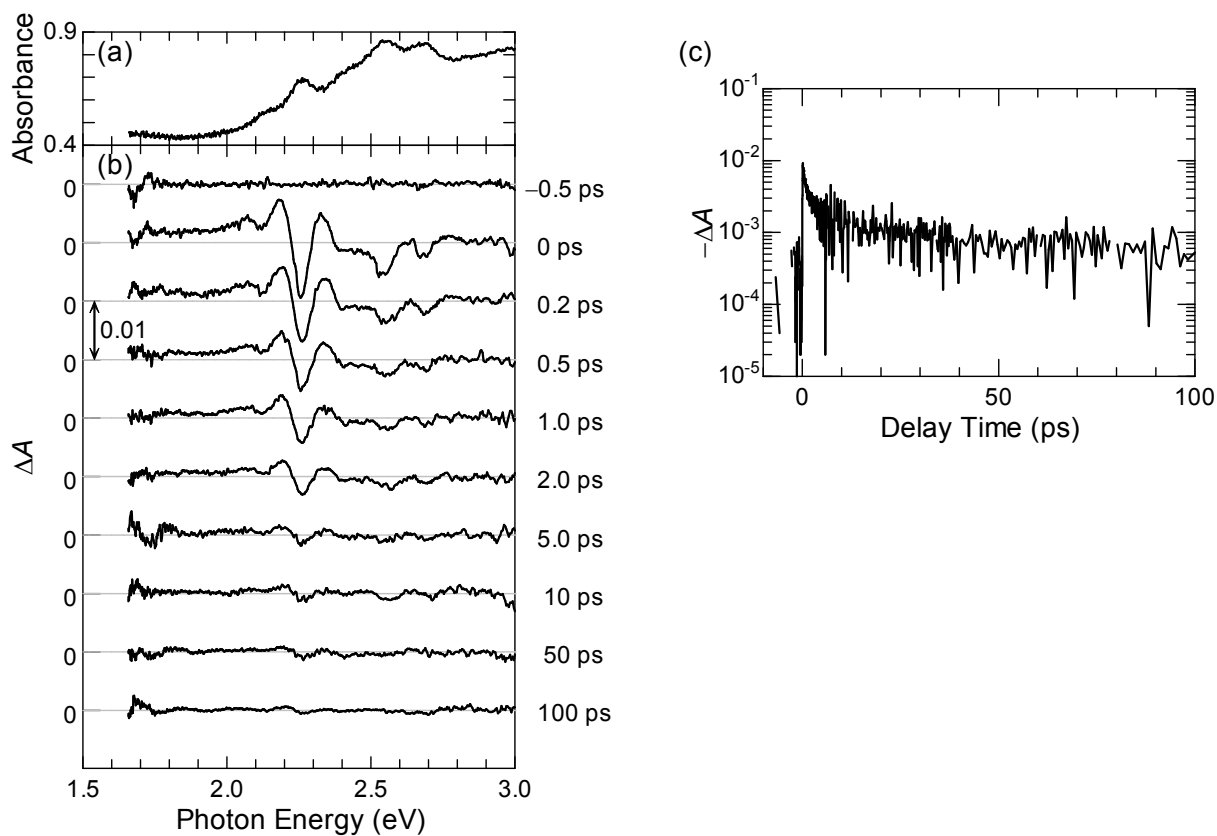

**Figure S2.** (a) Linear absorption spectrum of sample 1. (b) Differential absorption spectra at different delay times as indicated on the right of the figure. (c) Time evolution of differential absorption at 2.26 eV corresponding to the  $E_{33}$  exciton band. The excitation photon energy is 0.73 eV corresponding to the  $E_{11}$  exciton band, and the pump fluence is  $1.9 \times 10^{14}$  photons  $\text{cm}^{-2}$  per pulse.

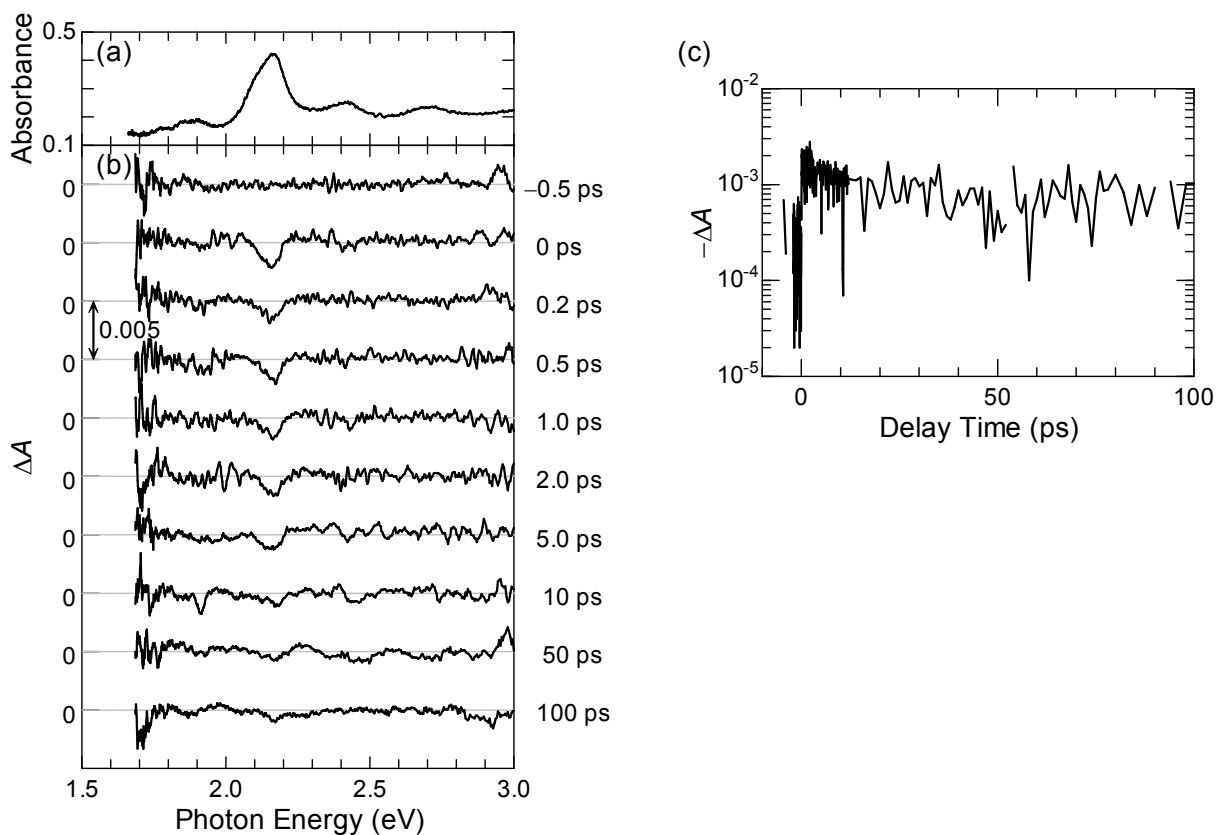

**Figure S3.** (a) Linear absorption spectrum of sample 2. (b) Differential absorption spectra at different delay times as indicated on the right of the figure. (c) Time evolution of differential absorption at 2.16 eV corresponding to the  $E_{22}$  exciton band. The excitation photon energy is 1.27 eV corresponding to the  $E_{11}$  exciton band, and the pump fluence is  $5.0 \times 10^{13}$  photons  $\text{cm}^{-2}$  per pulse.

## Voigt function used for curve fitting of linear absorption spectrum

We performed curve fitting of the linear absorption spectrum of sample 2 in the  $E_{22}$  band region. The spectrum is composed of (i) the  $E_{22}$  exciton absorption component due to semiconducting SWNTs, (ii) the  $M_{11}$  exciton absorption component due to metallic SWNTs, and (iii) the background component due to  $\pi$ -plasmon absorption in SWNTs and absorption and scattering by impurities such as amorphous carbons. The  $E_{22}$  exciton absorption component is fitted using a Voigt function, which is the convolution of Lorentz and Gauss functions. The Lorentz function represents an absorption band with homogeneous broadening of individual SWNT, and the Gauss function represents that with inhomogeneous broadening of SWNT ensemble. The width (full width at half maximum)  $\Gamma$  of the Lorentz function is set to 50 meV [S1], and the width  $\Gamma_{\text{inh}}$  of the Gauss function is an adjustable parameter for all SWNTs. The spectral weight  $S_i$  of the Voigt function for each chirality  $i$  is an adjustable parameter. The peak energy  $E_i$  of the  $E_{22}$  exciton absorption band for each chirality  $i$  is shifted from the reported value in ref [S2] (Since the surfactant used in this study (sodium cholate) is different from that used in ref [S2], the peak energies of exciton absorption bands are slightly shifted due to the environment effect [S3]). The shift value  $\Delta E_i$  is an adjustable parameter for all SWNTs. The exciton absorption peak in SWNTs is accompanied by sidebands on both low and high energy sides [S4–8]. The high-energy sideband is relatively strong and its spectral weight is about 10% of that of the main exciton absorption band [S4]. Thus, we take into account the high-energy sideband. In the  $E_{22}$  band region of (7,5) SWNT [S4], the peak energy of this sideband is situated above the main exciton absorption peak by  $\Delta E_s \sim 220$  meV, and its width is equivalent to the main exciton absorption band. We assume that these values are common to all SWNTs. The  $M_{11}$  exciton absorption component is fitted using two Gauss functions with the same width. The width  $\gamma$  and spectral weight  $B_j$  are adjustable parameters. The background component is fitted using a linear function, where the slope  $a$  and intercept  $b$  are adjustable.

The total fitting function is expressed as follows:

$$\sum_i S_i \left[ F_{\Gamma, \Gamma_{\text{inh}}} (\hbar\omega - E_i - \Delta E_i) + 0.1 F_{\Gamma, \Gamma_{\text{inh}}} (\hbar\omega - E_i - \Delta E_i - \Delta E_s) \right] + \sum_{j=1,2} B_j G_\gamma (\hbar\omega - M_j) + a\hbar\omega + b,$$

where

$$F_{\Gamma_0, \Gamma}(x) = \int_{-\infty}^{\infty} \frac{1}{\pi} \frac{\Gamma/2}{(x-X)^2 + (\Gamma/2)^2} \times \sqrt{\frac{\ln 2}{\pi}} \frac{1}{\Gamma_{\text{inh}}/2} \exp \left[ -\frac{X^2}{(\Gamma_{\text{inh}}/2)^2} \ln 2 \right] dX,$$

$$G_\gamma(x) = \sqrt{\frac{\ln 2}{\pi}} \frac{1}{\gamma/2} \exp \left[ -\frac{x^2}{(\gamma/2)^2} \ln 2 \right].$$

The fitted values of the adjustable parameters are listed in Table S1.

**Table S1.** Fitted Values of Adjustable Parameters in Curve Fitting of Linear Absorption Spectrum

| $i$   | (6,4) | (6,5) | (7,3) | (7,5) | (8,3) | (8,4) | (9,1) | (10,0) |
|-------|-------|-------|-------|-------|-------|-------|-------|--------|
| $S_i$ | 1.84  | 34.87 | 5.04  | 9.64  | 1.63  | 9.81  | 7.86  | 3.64   |

  

| $\Gamma_{\text{inh}}$<br>(meV) | $\Delta E_i$<br>(meV) | $M_1$ | $M_2$ | $B_1$ | $B_2$ | $\gamma$<br>(meV) | $a$<br>(eV <sup>-1</sup> ) | $b$    |
|--------------------------------|-----------------------|-------|-------|-------|-------|-------------------|----------------------------|--------|
| 80                             | -27.8                 | 2.40  | 2.70  | 4.42  | 7.58  | 200               | 0.1                        | -0.075 |

Calculated dependence of the total  $E_{22}$ -exciton number on the initial  $E_{11}$ -exciton number

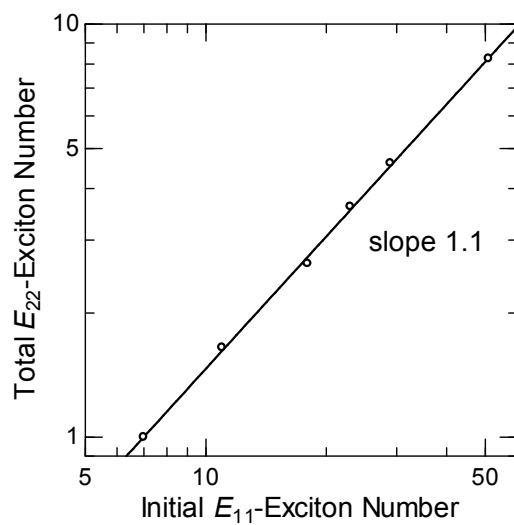

**Figure S4.** Total  $E_{22}$ -exciton number vs. initial  $E_{11}$ -exciton number. The ordinate is normalized by setting the minimum value of total  $E_{22}$ -exciton number to 1. The solid line is a least-square fit.

## References

- [S1] Lefebvre, J.; Fraser, J. M.; Finnie, P.; Homma, Y. *Phys. Rev. B* **2004**, *69*, 075403/1–5.
- [S2] Weisman, R. B.; Bachilo, S. M. *Nano Lett.* **2003**, *3*, 1235–1238.
- [S3] Hertel, T.; Hagen, A.; Talalaev, V.; Arnold, K.; Hennrich, F.; Kappes, M.; Rosenthal, S.; McBride, J.; Ulbricht, H.; Flahaut, E. *Nano Lett.* **2005**, *5*, 511–514.
- [S4] Miyauchi, Y.; Maruyama, S. *Phys. Rev. B* **2006**, *74*, 035415/1–7.
- [S5] Berciaud, S.; Cognet, L.; Poulin, P.; Weisman, R. B.; Lounis, B. *Nano Lett.* **2007**, *7*, 1203–1207.
- [S6] Matsunaga, R.; Matsuda, K.; Kanemitsu, Y. *Phys. Rev. B* **2010**, *81*, 033401/1–4.
- [S7] Vora, P. M.; Tu, X.; Mele, E. J.; Zheng, M.; Kikkawa, J. M. *Phys. Rev. B* **2010**, *81*, 155123/1–9.
- [S8] Blackburn, J. L.; Holt, J. M.; Irurzun, V. M.; Resasco, D. E.; Rumbles, G. *Nano Lett.* **2012**, *12*, 1398–1403.
